# Supplementary material for: Analyte-concentrating 3D hybrid plasmonic nanostructures for use in highly sensitive chemical sensors
Source: Royal Society of Chemistry journal article supplement (doi:10.1039/c6ra20962a), 2016-01-01
Supplement: c6ra20962a1.pdf [file c6ra20962a1.pdf]

# Supplementary Information

## Analyte-concentrating 3D hybrid plasmonic nanostructures for use in highly sensitive chemical sensors

Minkyoung Lee,<sup>†ab</sup> ChaeWon Mun,<sup>†a</sup> Dong-Ho Kim<sup>\*a</sup>, Seung-Cheol Chang<sup>\*b</sup> and Sung-Gyu

Park<sup>\*a</sup>

[<sup>a</sup>] Dr. S. -G. Park, M. K. Lee, C. W. Mun, Dr. D. -H. Kim  
Advanced Functional Thin Films Department,  
Korea Institute of Materials Science (KIMS),  
Changwon, Gyeongnam 641-831 Korea  
E-mail: [sgpark@kims.re.kr](mailto:sgpark@kims.re.kr), [dhkim2@kims.re.kr](mailto:dhkim2@kims.re.kr)

[<sup>b</sup>] Prof. S. C. Chang, M. K. Lee  
Institute of BioPhysio Sensor Technology, Graduate Department of Molecular Science Technology,  
Pusan National University, Busan 46241, Korea.,  
E-mail: [s.c.chang@pusan.ac.kr](mailto:s.c.chang@pusan.ac.kr)

[<sup>†</sup>] M. Lee and C. W. Mun contributed equally to this paper

### **This supplementary information includes:**

Enhancement Factor Calculation

Supplementary Figures (Figure S1-S3)

Supplementary Videos (Video 1-3)

### - Enhancement Factor Calculation

The average enhancement factor (EF) of the SERS substrate was defined as

$$EF = \left( \frac{I_{SERS}}{I_{Raman}} \right) \times \left( \frac{N_{Raman}}{N_{SERS}} \right)$$

where  $I_{SERS}$  is the SERS intensity of the probe molecules (in our case, benzenethiol (BT) molecules),  $I_{Raman}$  is the normal Raman intensity of BT,  $N_{SERS}$  is the number of BT molecules adsorbed onto the SERS substrate, and  $N_{Raman}$  is the number of BT molecules present in the Raman measurements.

### - $I_{SERS}$ and $I_{Raman}$ Calculation

Based on the Raman intensities at  $998 \text{ cm}^{-1}$  and  $1015 \text{ cm}^{-1}$ ,  $I_{SERS}/I_{Raman}$  are  $6.6 \times 10^2$  and  $1.7 \times 10^3$ , respectively.

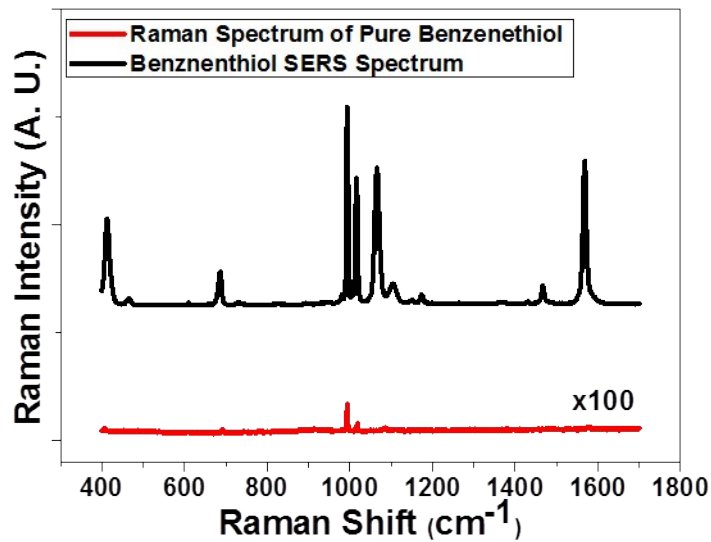

**Fig. S1** SERS spectrum measured from the benzenethiol monolayer-treated 3D Ag nanostructures (black line), and the normal Raman spectrum obtained from the pure benzenethiol solution (red line).

### - $N_{SERS}$ and $N_{Raman}$ Calculation

We used a 50x objective lens (NA = 0.5) to conduct the Raman measurements. The detection beam diameter was  $1.54 \mu\text{m}$ , and the illumination area was  $1.86 \mu\text{m}^2$ . The packing density of BT molecules across the Ag surface was  $6.8 \times 10^{14} \text{ cm}^{-2}$ .<sup>1</sup> The areal density of Ag NPs with oblate ellipsoid shapes was  $330 \mu\text{m}^{-2}$ .<sup>2</sup> The surface area of the Ag NPs was calculated as follows. For simple calculation, the Ag NPs assumed to be half-spheres and to be 50 nm in diameter. Actually, the sizes and shapes of Ag NPs are random. Therefore, the SERS

active surface area was about 1.3 times the value of a simple Ag flat layer. The value of  $N_{SERS}$  is the product of the packing density  $\times$  the surface area ratio (1.3), yielding  $1.6 \times 10^7$  molecules.  $N_{Raman}$  was calculated using the confocal volume ( $18.9 \mu\text{m}^3$ ), BT density (1.08 g/mL), and molecular weight (110.19 g/mol), yielding a value of  $1.1 \times 10^{11}$  molecules. Therefore,  $N_{Raman}/N_{SERS}$  was  $6.9 \times 10^3$ .

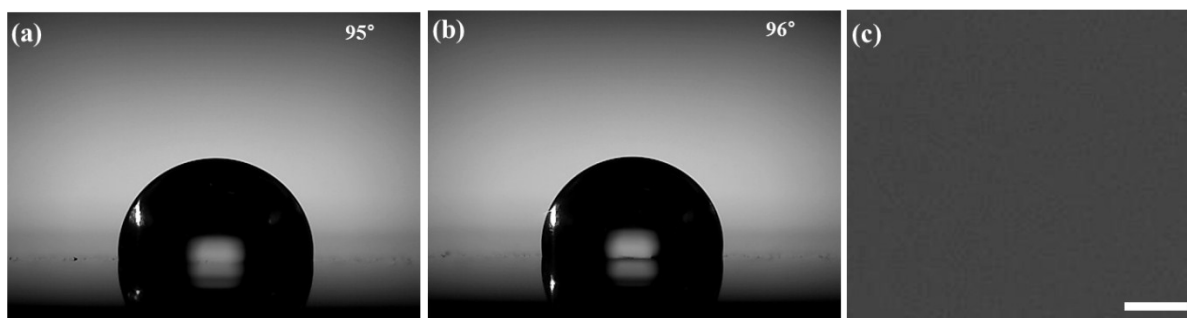

**Fig. S2** Change of water contact angles on the smooth alumina thin films (a) before and (b) after PFDT treatments. The contact angles remained unchanged upon PFDT vapor treatment. (c) surface morphologies of 50 nm thick alumina thin films. The scale bar is 1  $\mu\text{m}$ .

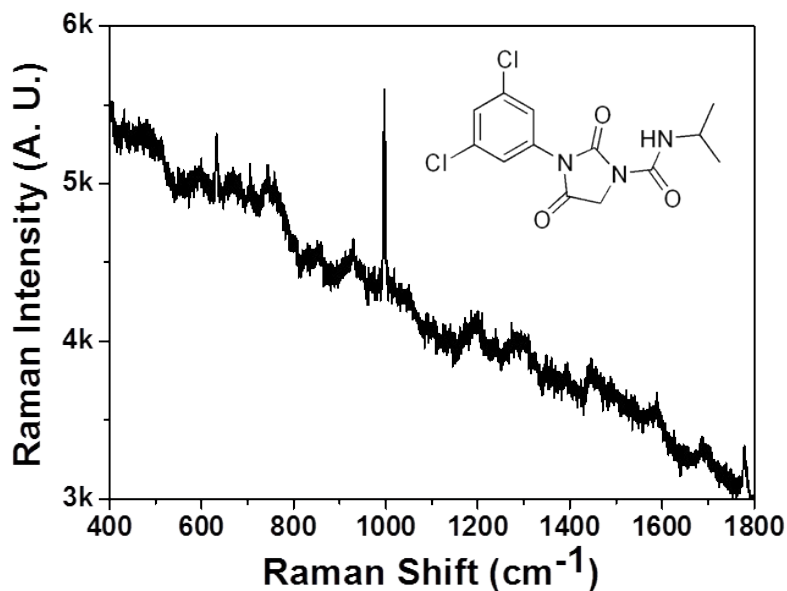

**Fig. S3** Raman spectrum of iprodione powder. Inset shows the chemical structure of iprodione molecule. . Iprodione is characterized by a major peak at  $1000 \text{ cm}^{-1}$ , which corresponds to a benzene breathing mode.

- 1 T. Y. Jeon, S.-G. Park, D.-H. Kim and S.-H. Kim, *Adv. Funct. Mater.*, 2015, **25**, 4681–4688.
- 2 S.-G. Park, C. Mun, M. Lee, T. Y. Jeon, H.-S. Shim, Y.-J. Lee, J.-D. Kwon, C. S. Kim and D.-H. Kim, *Adv. Mater.*, 2015, **27**, 4290–4295.

**Video 1. Placing a 8- $\mu$ l water droplet on the 3D superhydrophobic SERS surface.** This video show that placing a 8- $\mu$ l water droplet on the 3D superhydrophobic SERS surface is very difficult due to the slippery nature of the surface.

**Video 2. Penetration of water drop into as-prepared 3D porous Ag nanostructures.** The water drop soaked into the as-prepared 3D SERS substrates. The water soaked into both the stacked Ag NWs (thickness  $\approx 0.20 \mu\text{m}$ ) and a glass microfiber filter (thickness  $\approx 420 \mu\text{m}$ ) within 2 sec.

**Video 3. Complete wetting of acetone into as-prepared 3D porous Ag nanostructures.** The 3D porous Ag nanostructures show a complete wetting of acetone with CA of  $0^\circ$ .
